# Supplementary material
Source: PubMed Central journal article supplement (PMC7422727)
Supplement: NIHMS1613615-supplement-1.pdf [file NIHMS1613615-supplement-1.pdf]

# A brief history of space flight from 1961 to 2020: An analysis of missions and astronaut demographics

## Supplemental Material

Michael G. Smith <sup>a</sup>, Michelle Kelley <sup>a</sup> and Mathias Basner <sup>a</sup>

<sup>a</sup> Unit for Experimental Psychiatry, Division of Sleep and Chronobiology, Department of Psychiatry, University of Pennsylvania Perelman School of Medicine, Philadelphia, PA

### 1. Supplemental results tables

#### 1.1. Quasi-separation of data

Table S1 Cross-tabulation between gender and education, showing quasi-separation of data. Data shown are the number of astronauts of each gender in each education category. Education data were missing for n=5 astronauts.

| Education    | Female | Male | Total |
|--------------|--------|------|-------|
| No college   | 0      | 5    | 5     |
| BS           | 6      | 90   | 96    |
| MS           | 19     | 238  | 257   |
| PhD/MD       | 39     | 160  | 199   |
| <b>Total</b> | 64     | 493  | 557   |

Table S2 Cross-tabulation between agency and education, showing quasi-separation of data. Data shown are the number of astronauts from each agency in each education category. Education data were missing for n=5 astronauts.

| Education    | Agency |           |     |      |     |      | Total |
|--------------|--------|-----------|-----|------|-----|------|-------|
|              | NASA   | Roscosmos | ESA | CNSA | CSA | JAXA |       |
| No college   | 1      | 2         | 1   | 1    | 0   | 0    | 5     |
| BS           | 53     | 26        | 7   | 7    | 1   | 2    | 96    |
| MS           | 171    | 68        | 12  | 1    | 2   | 3    | 257   |
| PhD/MD       | 124    | 47        | 16  | 0    | 6   | 6    | 199   |
| <b>Total</b> | 349    | 143       | 36  | 9    | 9   | 11   | 557   |

## 1.2. Gender: Mission-level

Due to missing data, 20 spaceflights (1.7%) could not be included in regression analysis of astronaut gender. A total of 1150 spaceflights therefore contributed to the analysis. At the level of individual missions, there were significant effects on gender by military background, children and age at launch (Table S3). Similarly to the individual-level analysis, astronauts were significantly less likely to be female with increasing age and with increasing numbers of children, and if they had a military background. The point estimates for the likelihood of an astronaut being a female have increased over time, but this was not statistically significant.

Table S3 Mission-level effects on gender. Statistically significant Type III effects highlighted with bold typeface. Odds ratios (OR) for being female are shown for each level of categorical variables, and for each one unit increase of continuous variables.

| Covariate                  | F           | Type III test |             |                  | Odds ratios |                 |              |
|----------------------------|-------------|---------------|-------------|------------------|-------------|-----------------|--------------|
|                            |             | df1           | df2         | p-value          | Level       | OR              | 95% CI       |
| Education                  | 1.0         | 2             | 1131        | 0.359            | No college  | -               | -            |
|                            |             |               |             |                  | B           | Reference level |              |
|                            |             |               |             |                  | M           | 1.17            | 0.24; 5.80   |
|                            |             |               |             |                  | PhD/MD      | 2.44            | 0.49; 12.21  |
| Marital status             | 1.1         | 2             | 1131        | 0.324            | Unmarried   | Reference level |              |
|                            |             |               |             |                  | Married     | 0.74            | 0.16; 3.44   |
|                            |             |               |             |                  | Divorced    | 3.31            | 0.33; 33.30  |
| Total missions             | 0.7         | 1             | 1131        | 0.406            | OR/mission  | 0.86            | 0.61; 1.22   |
| <b>Children</b>            | <b>18.2</b> | <b>1</b>      | <b>1131</b> | <b>&lt;0.001</b> | OR/child    | 0.37            | 0.24; 0.59   |
| Decade                     | 1.4         | 4             | 1131        | 0.221            | 1960s       | Reference level |              |
|                            |             |               |             |                  | 1970s       | -               | -            |
|                            |             |               |             |                  | 1980s       | 1.45            | 0.08; 26.38  |
|                            |             |               |             |                  | 1990s       | 3.38            | 0.20; 57.91  |
|                            |             |               |             |                  | 2000s       | 6.43            | 0.34; 121.28 |
|                            |             |               |             |                  | 2010s       | 9.70            | 0.38; 244.67 |
| Agency                     | 2.1         | 5             | 1131        | 0.063            | NASA        | Reference level |              |
|                            |             |               |             |                  | ROSCOSMOS   | 0.10            | 0.02; 0.50   |
|                            |             |               |             |                  | ESA         | 0.21            | 0.02; 1.87   |
|                            |             |               |             |                  | CNSA        | 1.16            | 0.04; 33.19  |
|                            |             |               |             |                  | CSA         | 1.71            | 0.12; 23.66  |
|                            |             |               |             |                  | JAXA        | 0.19            | 0.02; 2.19   |
| <b>Military background</b> | <b>5.5</b>  | <b>1</b>      | <b>1131</b> | <b>0.019</b>     | No          | Reference level |              |
|                            |             |               |             |                  | Yes         | 0.27            | 0.09; 0.80   |
| <b>Age at launch</b>       | <b>12.2</b> | <b>1</b>      | <b>1131</b> | <b>0.001</b>     | OR/year     | 0.86            | 0.80; 0.94   |
| Mission duration           | 0.0         | 1             | 1131        | 0.926            | OR/day      | 1.00            | 0.99; 1.01   |

df: degrees of freedom; CI: confidence interval

## 1.3. Military background: Mission-level

Due to missing data, 23 spaceflights (1.8%) could not be included in regression analysis of military background. A total of 1231 spaceflights therefore contributed to the analysis. Results of the mission-level analysis of military background are given in Table S4. As with the individual-level analysis, there were significant effects of education, launch decade and gender on the likelihood of the astronaut having a military background. Men were more than four times as likely to have a military background than women.

Post-hoc tests for education are given in Table S16. Astronauts with a PhD/MD education were significantly less likely to have a military background than astronauts with a Bachelor's-level (OR=0.023)

or Master's level (OR=0.025) education. Other education levels were not significantly different from each other.

Post-hoc tests for launch decade are given in Table S17. Astronauts in the 1960's and 1970's were significantly more likely to have a military background than astronauts in the 1980's, 1990's, 2000's and 2010's. The likelihood of an astronaut having a military background at the mission-level was not significantly different between any other launch decades.

Table S4 Mission-level effects on military background. Statistically significant Type III effects highlighted with bold typeface. Odds ratios (OR) for having a military background are shown for each level of categorical variables, and for each one unit increase of continuous variables.

| Covariate        | Type III test |          |             |                  | Odds ratios |                 |              |
|------------------|---------------|----------|-------------|------------------|-------------|-----------------|--------------|
|                  | F             | df1      | df2         | p-value          | Level       | OR              | 95% CI       |
| <b>Education</b> | <b>44.0</b>   | <b>3</b> | <b>1211</b> | <b>&lt;0.001</b> | No college  | Reference level |              |
|                  |               |          |             |                  | B           | 2.13            | 0.04; 101.80 |
|                  |               |          |             |                  | M           | 2.24            | 0.05; 102.76 |
|                  |               |          |             |                  | PhD/MD      | 0.05            | 0.00; 2.44   |
| Marital status   | 0.8           | 2        | 1211        | 0.459            | Unmarried   | Reference level |              |
|                  |               |          |             |                  | Married     | 1.36            | 0.30; 6.11   |
|                  |               |          |             |                  | Divorced    | 0.46            | 0.05; 4.26   |
| Total missions   | 0.1           | 1        | 1211        | 0.779            | OR/mission  | 1.03            | 0.82; 1.31   |
| Children         | 0.3           | 1        | 1211        | 0.607            | OR/child    | 0.93            | 0.71; 1.22   |
| <b>Decade</b>    | <b>3.3</b>    | <b>5</b> | <b>1211</b> | <b>0.006</b>     | 1960s       | Reference level |              |
|                  |               |          |             |                  | 1970s       | 0.52            | 0.11; 2.47   |
|                  |               |          |             |                  | 1980s       | 0.11            | 0.02; 0.54   |
|                  |               |          |             |                  | 1990s       | 0.09            | 0.02; 0.42   |
|                  |               |          |             |                  | 2000s       | 0.06            | 0.01; 0.33   |
|                  |               |          |             |                  | 2010s       | 0.11            | 0.02; 0.74   |
| Agency           | 1.7           | 4        | 1211        | 0.140            | NASA        | Reference level |              |
|                  |               |          |             |                  | ROSCOSMOS   | 0.51            | 0.22; 1.17   |
|                  |               |          |             |                  | ESA         | 0.89            | 0.25; 3.23   |
|                  |               |          |             |                  | CNSA        | -               | -            |
|                  |               |          |             |                  | CSA         | 0.35            | 0.03; 3.59   |
|                  |               |          |             |                  | JAXA        | 0.07            | 0.01; 0.81   |
| <b>Gender</b>    | <b>8.1</b>    | <b>1</b> | <b>1211</b> | <b>0.004</b>     | Female      | Reference level |              |
|                  |               |          |             |                  | Male        | 4.50            | 1.60; 12.67  |
| Age at launch    | 0.1           | 1        | 1211        | 0.733            | OR/year     | 1.01            | 0.96; 1.06   |
| Duration         | 1.6           | 1        | 1211        | 0.210            | OR/day      | 1.00            | 0.99; 1.00   |

df: degrees of freedom; CI: confidence interval

## 1.4. Post-hoc test results

Table S5 Pairwise comparisons for effect of agency on astronaut gender (individual-level analysis).

| Agency (A) | Agency (B)       | Mean difference (A-B) | SE           | p-value      |
|------------|------------------|-----------------------|--------------|--------------|
| JAXA       | CSA              | -0.19                 | 0.164        | 0.245        |
|            | CNSA             | -0.06                 | 0.093        | 0.548        |
|            | ESA              | 0                     | 0.031        | 0.957        |
|            | Roscosmos        | 0.02                  | 0.025        | 0.529        |
|            | NASA             | -0.07                 | 0.041        | 0.067        |
| CSA        | JAXA             | 0.19                  | 0.164        | 0.245        |
|            | CNSA             | 0.14                  | 0.188        | 0.471        |
|            | ESA              | 0.19                  | 0.164        | 0.239        |
|            | Roscosmos        | 0.21                  | 0.165        | 0.211        |
|            | NASA             | 0.12                  | 0.159        | 0.464        |
| CNSA       | JAXA             | 0.06                  | 0.093        | 0.548        |
|            | CSA              | -0.14                 | 0.188        | 0.471        |
|            | ESA              | 0.06                  | 0.093        | 0.538        |
|            | Roscosmos        | 0.07                  | 0.092        | 0.438        |
|            | NASA             | -0.02                 | 0.095        | 0.840        |
| ESA        | JAXA             | 0                     | 0.031        | 0.957        |
|            | CSA              | -0.19                 | 0.164        | 0.239        |
|            | CNSA             | -0.06                 | 0.093        | 0.538        |
|            | Roscosmos        | 0.01                  | 0.023        | 0.523        |
|            | NASA             | -0.08                 | 0.040        | 0.057        |
| Roscosmos  | JAXA             | -0.02                 | 0.025        | 0.529        |
|            | CSA              | -0.21                 | 0.165        | 0.211        |
|            | CNSA             | -0.07                 | 0.092        | 0.438        |
|            | ESA              | -0.01                 | 0.023        | 0.523        |
|            | <b>NASA</b>      | <b>-0.09</b>          | <b>0.040</b> | <b>0.023</b> |
| NASA       | JAXA             | 0.07                  | 0.041        | 0.067        |
|            | CSA              | -0.12                 | 0.159        | 0.464        |
|            | CNSA             | 0.02                  | 0.095        | 0.840        |
|            | ESA              | 0.08                  | 0.040        | 0.057        |
|            | <b>Roscosmos</b> | <b>0.09</b>           | <b>0.040</b> | <b>0.023</b> |

Table S6 Pairwise comparisons for effect of education on military background (individual-level analysis).

| Education (A) | Education (B) | Mean difference (A-B) | SE           | p-value           |
|---------------|---------------|-----------------------|--------------|-------------------|
| PhD/MD        | <b>M</b>      | <b>-0.55</b>          | <b>0.067</b> | <b>&lt;0.0001</b> |
|               | <b>B</b>      | <b>-0.51</b>          | <b>0.087</b> | <b>&lt;0.0001</b> |
|               | No college    | -0.39                 | 0.329        | 0.239             |
| M             | <b>PhD/MD</b> | <b>0.55</b>           | <b>0.067</b> | <b>&lt;0.0001</b> |
|               | B             | 0.04                  | 0.08         | 0.627             |
|               | No college    | 0.17                  | 0.325        | 0.611             |
| B             | <b>PhD/MD</b> | <b>0.51</b>           | <b>0.087</b> | <b>&lt;0.0001</b> |
|               | M             | -0.04                 | 0.08         | 0.627             |
|               | No college    | 0.13                  | 0.329        | 0.701             |
| No college    | PhD/MD        | 0.39                  | 0.329        | 0.239             |
|               | M             | -0.17                 | 0.325        | 0.611             |
|               | B             | -0.13                 | 0.329        | 0.701             |

Table S7 Pairwise comparisons for effect of decade of first spaceflight on military background (individual-level analysis).

| Decade (A) | Decade (B)   | Mean difference (A-B) | SE           | p-value          |
|------------|--------------|-----------------------|--------------|------------------|
| 11-20      | 01-10        | 0.20                  | 0.119        | 0.091            |
|            | 91-00        | 0.12                  | 0.122        | 0.318            |
|            | 81-90        | 0.07                  | 0.125        | 0.568            |
|            | 71-80        | -0.20                 | 0.149        | 0.187            |
|            | <b>61-70</b> | <b>-0.39</b>          | <b>0.143</b> | <b>0.007</b>     |
| 01-10      | 11-20        | -0.20                 | 0.119        | 0.091            |
|            | 91-00        | -0.08                 | 0.066        | 0.225            |
|            | 81-90        | -0.13                 | 0.077        | 0.089            |
|            | <b>71-80</b> | <b>-0.40</b>          | <b>0.119</b> | <b>0.001</b>     |
|            | <b>61-70</b> | <b>-0.59</b>          | <b>0.103</b> | <b>&lt;0.001</b> |
| 91-00      | 11-20        | -0.12                 | 0.122        | 0.318            |
|            | 01-10        | 0.08                  | 0.066        | 0.225            |
|            | 81-90        | -0.05                 | 0.071        | 0.476            |
|            | <b>71-80</b> | <b>-0.32</b>          | <b>0.114</b> | <b>0.005</b>     |
|            | <b>61-70</b> | <b>-0.51</b>          | <b>0.101</b> | <b>&lt;0.001</b> |
| 81-90      | 11-20        | -0.07                 | 0.125        | 0.568            |
|            | 01-10        | 0.13                  | 0.077        | 0.089            |
|            | 91-00        | 0.05                  | 0.071        | 0.476            |
|            | <b>71-80</b> | <b>-0.27</b>          | <b>0.112</b> | <b>0.017</b>     |
|            | <b>61-70</b> | <b>-0.46</b>          | <b>0.107</b> | <b>&lt;0.001</b> |
| 71-80      | 11-20        | 0.20                  | 0.149        | 0.187            |
|            | <b>01-10</b> | <b>0.40</b>           | <b>0.119</b> | <b>0.001</b>     |
|            | <b>91-00</b> | <b>0.32</b>           | <b>0.114</b> | <b>0.005</b>     |
|            | <b>81-90</b> | <b>0.27</b>           | <b>0.112</b> | <b>0.017</b>     |
|            | 61-70        | -0.19                 | 0.126        | 0.133            |
| 61-70      | <b>11-20</b> | <b>0.39</b>           | <b>0.143</b> | <b>0.007</b>     |
|            | <b>01-10</b> | <b>0.59</b>           | <b>0.103</b> | <b>&lt;0.001</b> |
|            | <b>91-00</b> | <b>0.51</b>           | <b>0.101</b> | <b>&lt;0.001</b> |
|            | <b>81-90</b> | <b>0.46</b>           | <b>0.107</b> | <b>&lt;0.001</b> |
|            | 71-80        | 0.19                  | 0.126        | 0.133            |

Table S8 Pairwise comparisons for effect of agency on military background (individual-level analysis).

| Agency (A) | Agency (B)       | Mean difference (A-B) | SE           | p-value      |
|------------|------------------|-----------------------|--------------|--------------|
| JAXA       | CSA              | -0.17                 | 0.253        | 0.505        |
|            | <b>ESA</b>       | <b>-0.44</b>          | <b>0.174</b> | <b>0.012</b> |
|            | <b>Roscosmos</b> | <b>-0.32</b>          | <b>0.155</b> | <b>0.040</b> |
|            | <b>NASA</b>      | <b>-0.48</b>          | <b>0.146</b> | <b>0.001</b> |
| CSA        | JAXA             | 0.17                  | 0.253        | 0.505        |
|            | ESA              | -0.27                 | 0.232        | 0.249        |
|            | Roscosmos        | -0.15                 | 0.222        | 0.501        |
|            | NASA             | -0.31                 | 0.212        | 0.142        |
| ESA        | <b>JAXA</b>      | <b>0.44</b>           | <b>0.174</b> | <b>0.012</b> |
|            | CSA              | 0.27                  | 0.232        | 0.249        |
|            | Roscosmos        | 0.12                  | 0.125        | 0.340        |
|            | NASA             | -0.04                 | 0.11         | 0.691        |
| Roscosmos  | <b>JAXA</b>      | <b>0.32</b>           | <b>0.155</b> | <b>0.040</b> |
|            | CSA              | 0.15                  | 0.222        | 0.501        |
|            | ESA              | -0.12                 | 0.125        | 0.340        |
|            | <b>NASA</b>      | <b>-0.16</b>          | <b>0.074</b> | <b>0.029</b> |
| NASA       | <b>JAXA</b>      | <b>0.48</b>           | <b>0.146</b> | <b>0.001</b> |
|            | CSA              | 0.31                  | 0.212        | 0.142        |
|            | ESA              | 0.04                  | 0.11         | 0.691        |
|            | <b>Roscosmos</b> | <b>0.16</b>           | <b>0.074</b> | <b>0.029</b> |

Table S9 Pairwise comparisons for effect of decade of first spaceflight on astronaut age (individual-level analysis).

| Decade (A) | Decade (B)   | Mean difference (A-B) | SE           | p-value          |
|------------|--------------|-----------------------|--------------|------------------|
| 61-70      | <b>71-80</b> | <b>-3.81</b>          | <b>0.901</b> | <b>&lt;0.001</b> |
|            | <b>81-90</b> | <b>-5.39</b>          | <b>0.780</b> | <b>&lt;0.001</b> |
|            | <b>91-00</b> | <b>-5.09</b>          | <b>0.811</b> | <b>&lt;0.001</b> |
|            | <b>01-10</b> | <b>-8.69</b>          | <b>0.825</b> | <b>&lt;0.001</b> |
|            | <b>11-20</b> | <b>-7.47</b>          | <b>1.007</b> | <b>&lt;0.001</b> |
| 71-80      | <b>61-70</b> | <b>3.81</b>           | <b>0.901</b> | <b>&lt;0.001</b> |
|            | <b>81-90</b> | <b>-1.58</b>          | <b>0.761</b> | <b>0.038</b>     |
|            | 91-00        | -1.28                 | 0.786        | 0.104            |
|            | <b>01-10</b> | <b>-4.89</b>          | <b>0.795</b> | <b>&lt;0.001</b> |
| 81-90      | <b>11-20</b> | <b>-3.66</b>          | <b>0.985</b> | <b>&lt;0.001</b> |
|            | <b>61-70</b> | <b>5.39</b>           | <b>0.780</b> | <b>&lt;0.001</b> |
|            | <b>71-80</b> | <b>1.58</b>           | <b>0.761</b> | <b>0.038</b>     |
|            | 91-00        | 0.30                  | 0.537        | 0.578            |
|            | <b>01-10</b> | <b>-3.31</b>          | <b>0.578</b> | <b>&lt;0.001</b> |
| 91-00      | <b>11-20</b> | <b>-2.08</b>          | <b>0.854</b> | <b>0.015</b>     |
|            | <b>61-70</b> | <b>5.09</b>           | <b>0.811</b> | <b>&lt;0.001</b> |
|            | 71-80        | 1.28                  | 0.786        | 0.104            |
|            | 81-90        | -0.30                 | 0.537        | 0.578            |
|            | <b>01-10</b> | <b>-3.61</b>          | <b>0.574</b> | <b>&lt;0.001</b> |
| 01-10      | <b>11-20</b> | <b>-2.38</b>          | <b>0.848</b> | <b>0.005</b>     |
|            | <b>61-70</b> | <b>8.69</b>           | <b>0.825</b> | <b>&lt;0.001</b> |
|            | <b>71-80</b> | <b>4.89</b>           | <b>0.795</b> | <b>&lt;0.001</b> |
|            | <b>81-90</b> | <b>3.31</b>           | <b>0.578</b> | <b>&lt;0.001</b> |
|            | <b>91-00</b> | <b>3.61</b>           | <b>0.574</b> | <b>&lt;0.001</b> |
| 11-20      | 11-20        | 1.22                  | 0.843        | 0.146            |
|            | <b>61-70</b> | <b>7.47</b>           | <b>1.007</b> | <b>&lt;0.001</b> |
|            | <b>71-80</b> | <b>3.66</b>           | <b>0.985</b> | <b>&lt;0.001</b> |
|            | <b>81-90</b> | <b>2.08</b>           | <b>0.854</b> | <b>0.015</b>     |
|            | <b>91-00</b> | <b>2.38</b>           | <b>0.848</b> | <b>0.005</b>     |
|            | 01-10        | -1.22                 | 0.843        | 0.146            |

Table S10 Pairwise comparisons for effect of agency on astronaut age at first spaceflight (individual-level analysis).

| Agency (A) | Agency (B)       | Mean difference (A-B) | SE           | p-value          |
|------------|------------------|-----------------------|--------------|------------------|
| NASA       | <b>Roscosmos</b> | <b>2.22</b>           | <b>0.496</b> | <b>&lt;0.001</b> |
|            | ESA              | 1.32                  | 0.828        | 0.111            |
|            | <b>CNSA</b>      | <b>4.70</b>           | <b>1.804</b> | <b>0.009</b>     |
|            | CSA              | -0.74                 | 1.525        | 0.629            |
| Roscosmos  | <b>NASA</b>      | <b>-2.22</b>          | <b>0.496</b> | <b>&lt;0.001</b> |
|            | ESA              | -0.90                 | 0.909        | 0.320            |
|            | CNSA             | 2.48                  | 1.817        | 0.172            |
|            | CSA              | -2.96                 | 1.578        | 0.061            |
| ESA        | <b>JAXA</b>      | <b>-1.38</b>          | <b>1.429</b> | <b>0.334</b>     |
|            | NASA             | -1.32                 | 0.828        | 0.111            |
|            | Roscosmos        | 0.90                  | 0.909        | 0.320            |
|            | CNSA             | 3.39                  | 1.935        | 0.080            |
| CNSA       | CSA              | -2.06                 | 1.668        | 0.218            |
|            | <b>JAXA</b>      | <b>-0.48</b>          | <b>1.558</b> | <b>0.759</b>     |
|            | <b>NASA</b>      | <b>-4.70</b>          | <b>1.804</b> | <b>0.009</b>     |
|            | Roscosmos        | -2.48                 | 1.817        | 0.172            |
| CSA        | ESA              | -3.39                 | 1.935        | 0.080            |
|            | <b>CSA</b>       | <b>-5.44</b>          | <b>2.350</b> | <b>0.021</b>     |
|            | JAXA             | -3.86                 | 2.215        | 0.081            |
|            | NASA             | 0.74                  | 1.525        | 0.629            |
| JAXA       | Roscosmos        | 2.96                  | 1.578        | 0.061            |
|            | ESA              | 2.06                  | 1.668        | 0.218            |
|            | <b>CNSA</b>      | <b>5.44</b>           | <b>2.350</b> | <b>0.021</b>     |
|            | JAXA             | 1.58                  | 2.014        | 0.433            |
| NASA       | NASA             | -0.84                 | 1.400        | 0.548            |
|            | Roscosmos        | 1.38                  | 1.429        | 0.334            |
|            | ESA              | 0.48                  | 1.558        | 0.759            |
|            | CNSA             | 3.86                  | 2.215        | 0.081            |
| CSA        | CSA              | -1.58                 | 2.014        | 0.433            |



Table S11 Pairwise comparisons for effect of agency on age at launch (mission-level analysis). P-values are adjusted for multiple hypothesis testing (Holm step-down procedure).

| Agency (A) | Agency (B)       | Contrast estimate (A-B) | SE           | p-value          |
|------------|------------------|-------------------------|--------------|------------------|
| NASA       | <b>Roscosmos</b> | <b>1.22</b>             | <b>0.588</b> | <b>0.038</b>     |
|            | <b>ESA</b>       | <b>2.25</b>             | <b>0.985</b> | <b>0.022</b>     |
|            | <b>CNSA</b>      | <b>7.96</b>             | <b>2.231</b> | <b>&lt;0.001</b> |
|            | CSA              | -0.73                   | 1.793        | 0.685            |
|            | JAXA             | 2.93                    | 1.669        | 0.080            |
| Roscosmos  | <b>NASA</b>      | <b>-1.22</b>            | <b>0.588</b> | <b>0.038</b>     |
|            | ESA              | 1.03                    | 1.075        | 0.336            |
|            | <b>CNSA</b>      | <b>6.74</b>             | <b>2.257</b> | <b>0.003</b>     |
|            | CSA              | -1.95                   | 1.852        | 0.293            |
|            | JAXA             | 1.71                    | 1.706        | 0.317            |
| ESA        | <b>NASA</b>      | <b>-2.25</b>            | <b>0.985</b> | <b>0.022</b>     |
|            | Roscosmos        | -1.03                   | 1.075        | 0.336            |
|            | <b>CNSA</b>      | <b>5.70</b>             | <b>2.383</b> | <b>0.017</b>     |
|            | CSA              | -2.98                   | 1.985        | 0.134            |
|            | JAXA             | 0.68                    | 1.868        | 0.718            |
| CNSA       | <b>NASA</b>      | <b>-7.96</b>            | <b>2.231</b> | <b>&lt;0.001</b> |
|            | <b>Roscosmos</b> | <b>-6.74</b>            | <b>2.257</b> | <b>0.003</b>     |
|            | <b>ESA</b>       | <b>-5.70</b>            | <b>2.383</b> | <b>0.017</b>     |
|            | <b>CSA</b>       | <b>-8.68</b>            | <b>2.839</b> | <b>0.002</b>     |
|            | JAXA             | -5.03                   | 2.724        | 0.065            |
| CSA        | NASA             | 0.73                    | 1.793        | 0.685            |
|            | Roscosmos        | 1.95                    | 1.852        | 0.293            |
|            | ESA              | 2.98                    | 1.985        | 0.134            |
|            | <b>CNSA</b>      | <b>8.68</b>             | <b>2.839</b> | <b>0.002</b>     |
|            | JAXA             | 3.66                    | 2.391        | 0.127            |
| JAXA       | NASA             | -2.93                   | 1.669        | 0.080            |
|            | Roscosmos        | -1.71                   | 1.706        | 0.317            |
|            | ESA              | -0.68                   | 1.868        | 0.718            |
|            | <b>CNSA</b>      | <b>5.03</b>             | <b>2.724</b> | <b>0.065</b>     |
|            | CSA              | -3.66                   | 2.391        | 0.127            |

Table S12 Pairwise comparisons for effect of launch decade on age at launch (mission-level analysis). P-values are adjusted for multiple hypothesis testing (Holm step-down procedure).

| Decade<br>(A) | Decade<br>(B) | Contrast<br>estimate (A-B) | SE           | p-value          |
|---------------|---------------|----------------------------|--------------|------------------|
| 61-70         | <b>71-80</b>  | <b>-4.68</b>               | <b>0.724</b> | <b>&lt;0.001</b> |
|               | <b>81-90</b>  | <b>-7.06</b>               | <b>0.761</b> | <b>&lt;0.001</b> |
|               | <b>91-00</b>  | <b>-10.12</b>              | <b>0.774</b> | <b>&lt;0.001</b> |
|               | <b>01-10</b>  | <b>-15.03</b>              | <b>0.800</b> | <b>&lt;0.001</b> |
|               | <b>11-20</b>  | <b>-18.50</b>              | <b>0.897</b> | <b>&lt;0.001</b> |
| 71-80         | <b>61-70</b>  | <b>4.68</b>                | <b>0.724</b> | <b>&lt;0.001</b> |
|               | <b>81-90</b>  | <b>-2.38</b>               | <b>0.621</b> | <b>&lt;0.001</b> |
|               | <b>91-00</b>  | <b>-5.44</b>               | <b>0.650</b> | <b>&lt;0.001</b> |
|               | <b>01-10</b>  | <b>-10.35</b>              | <b>0.682</b> | <b>&lt;0.001</b> |
|               | <b>11-20</b>  | <b>-13.82</b>              | <b>0.791</b> | <b>&lt;0.001</b> |
| 81-90         | <b>61-70</b>  | <b>7.06</b>                | <b>0.761</b> | <b>&lt;0.001</b> |
|               | <b>71-80</b>  | <b>2.38</b>                | <b>0.621</b> | <b>&lt;0.001</b> |
|               | <b>91-00</b>  | <b>-3.06</b>               | <b>0.361</b> | <b>&lt;0.001</b> |
|               | <b>01-10</b>  | <b>-7.97</b>               | <b>0.441</b> | <b>&lt;0.001</b> |
|               | <b>11-20</b>  | <b>-11.44</b>              | <b>0.605</b> | <b>&lt;0.001</b> |
| 91-00         | <b>61-70</b>  | <b>10.12</b>               | <b>0.774</b> | <b>&lt;0.001</b> |
|               | <b>71-80</b>  | <b>5.44</b>                | <b>0.650</b> | <b>&lt;0.001</b> |
|               | <b>81-90</b>  | <b>3.06</b>                | <b>0.361</b> | <b>&lt;0.001</b> |
|               | <b>01-10</b>  | <b>-4.91</b>               | <b>0.333</b> | <b>&lt;0.001</b> |
|               | <b>11-20</b>  | <b>-8.38</b>               | <b>0.541</b> | <b>&lt;0.001</b> |
| 01-10         | <b>61-70</b>  | <b>15.03</b>               | <b>0.800</b> | <b>&lt;0.001</b> |
|               | <b>71-80</b>  | <b>10.35</b>               | <b>0.682</b> | <b>&lt;0.001</b> |
|               | <b>81-90</b>  | <b>7.97</b>                | <b>0.441</b> | <b>&lt;0.001</b> |
|               | <b>91-00</b>  | <b>4.91</b>                | <b>0.333</b> | <b>&lt;0.001</b> |
|               | <b>11-20</b>  | <b>-3.48</b>               | <b>0.478</b> | <b>&lt;0.001</b> |
| 11-20         | <b>61-70</b>  | <b>18.50</b>               | <b>0.897</b> | <b>&lt;0.001</b> |
|               | <b>71-80</b>  | <b>13.82</b>               | <b>0.791</b> | <b>&lt;0.001</b> |
|               | <b>81-90</b>  | <b>11.44</b>               | <b>0.605</b> | <b>&lt;0.001</b> |
|               | <b>91-00</b>  | <b>8.38</b>                | <b>0.541</b> | <b>&lt;0.001</b> |
|               | <b>01-10</b>  | <b>3.48</b>                | <b>0.478</b> | <b>&lt;0.001</b> |

Table S13 Pairwise comparisons for effect of education on mission duration (mission-level analysis). P-values are adjusted for multiple hypothesis testing (Holm step-down procedure).

| Education (A) | Education (B)     | Contrast estimate (A-B) | SE           | p-value      |
|---------------|-------------------|-------------------------|--------------|--------------|
| No college    | <b>B</b>          | <b>-8.27</b>            | <b>3.013</b> | <b>0.006</b> |
|               | <b>M</b>          | <b>-9.96</b>            | <b>3.102</b> | <b>0.001</b> |
|               | <b>PhD/MD</b>     | <b>-6.97</b>            | <b>2.895</b> | <b>0.016</b> |
| B             | <b>No college</b> | <b>8.27</b>             | <b>3.013</b> | <b>0.006</b> |
|               | M                 | -1.70                   | 1.422        | 0.233        |
|               | PhD/MD            | 1.30                    | 1.468        | 0.377        |
| M             | <b>No college</b> | <b>9.96</b>             | <b>3.102</b> | <b>0.001</b> |
|               | B                 | 1.70                    | 1.422        | 0.233        |
|               | <b>PhD/MD</b>     | <b>2.99</b>             | <b>1.347</b> | <b>0.027</b> |
| PhD/MD        | <b>No college</b> | <b>6.97</b>             | <b>2.895</b> | <b>0.016</b> |
|               | B                 | -1.30                   | 1.468        | 0.377        |
|               | <b>M</b>          | <b>-2.99</b>            | <b>1.347</b> | <b>0.027</b> |

Table S14 Pairwise comparisons for effect of agency on mission duration (mission-level analysis). P-values are adjusted for multiple hypothesis testing (Holm step-down procedure).

| Agency (A) | Agency (B)       | Contrast estimate (A-B) | SE           | p-value          |
|------------|------------------|-------------------------|--------------|------------------|
| NASA       | <b>Roscosmos</b> | <b>-28.93</b>           | <b>5.563</b> | <b>&lt;0.001</b> |
|            | ESA              | -4.11                   | 2.097        | 0.050            |
|            | <b>CNSA</b>      | <b>7.32</b>             | <b>1.399</b> | <b>&lt;0.001</b> |
|            | CSA              | -1.57                   | 2.971        | 0.598            |
|            | JAXA             | -5.47                   | 3.922        | 0.163            |
| Roscosmos  | <b>NASA</b>      | <b>28.93</b>            | <b>5.563</b> | <b>&lt;0.001</b> |
|            | <b>ESA</b>       | <b>24.81</b>            | <b>5.466</b> | <b>&lt;0.001</b> |
|            | <b>CNSA</b>      | <b>36.25</b>            | <b>6.582</b> | <b>&lt;0.001</b> |
|            | <b>CSA</b>       | <b>27.36</b>            | <b>6.123</b> | <b>&lt;0.001</b> |
|            | <b>JAXA</b>      | <b>23.46</b>            | <b>6.075</b> | <b>&lt;0.001</b> |
| ESA        | NASA             | 4.11                    | 2.097        | 0.050            |
|            | <b>Roscosmos</b> | <b>-24.81</b>           | <b>5.466</b> | <b>&lt;0.001</b> |
|            | <b>CNSA</b>      | <b>11.44</b>            | <b>2.699</b> | <b>&lt;0.001</b> |
|            | CSA              | 2.55                    | 3.509        | 0.468            |
|            | JAXA             | -1.36                   | 4.237        | 0.749            |
| CNSA       | <b>NASA</b>      | <b>-7.32</b>            | <b>1.399</b> | <b>&lt;0.001</b> |
|            | <b>Roscosmos</b> | <b>-36.25</b>           | <b>6.582</b> | <b>&lt;0.001</b> |
|            | <b>ESA</b>       | <b>-11.44</b>           | <b>2.699</b> | <b>&lt;0.001</b> |
|            | <b>CSA</b>       | <b>-8.89</b>            | <b>3.331</b> | <b>0.008</b>     |
|            | <b>JAXA</b>      | <b>-12.79</b>           | <b>4.352</b> | <b>0.003</b>     |
| CSA        | NASA             | 1.57                    | 2.971        | 0.598            |
|            | <b>Roscosmos</b> | <b>-27.36</b>           | <b>6.123</b> | <b>&lt;0.001</b> |
|            | ESA              | -2.55                   | 3.509        | 0.468            |
|            | <b>CNSA</b>      | <b>8.89</b>             | <b>3.331</b> | <b>0.008</b>     |
|            | JAXA             | -3.90                   | 4.796        | 0.416            |
| JAXA       | NASA             | 5.47                    | 3.922        | 0.163            |
|            | <b>Roscosmos</b> | <b>-23.46</b>           | <b>6.075</b> | <b>&lt;0.001</b> |
|            | ESA              | 1.36                    | 4.237        | 0.749            |
|            | <b>CNSA</b>      | <b>12.79</b>            | <b>4.352</b> | <b>0.003</b>     |
|            | CSA              | 3.90                    | 4.796        | 0.416            |

Table S15 Pairwise comparisons for effect of launch decade on mission duration (mission-level analysis). P-values are adjusted for multiple hypothesis testing (Holm step-down procedure).

| Decade (A) | Decade (B)   | Contrast estimate (A-B) | SE            | p-value          |
|------------|--------------|-------------------------|---------------|------------------|
| 61-70      | <b>71-80</b> | <b>-4.80</b>            | <b>1.271</b>  | <b>&lt;0.001</b> |
|            | <b>81-90</b> | <b>-3.95</b>            | <b>0.909</b>  | <b>&lt;0.001</b> |
|            | <b>91-00</b> | <b>-7.28</b>            | <b>1.43</b>   | <b>&lt;0.001</b> |
|            | <b>01-10</b> | <b>-15.43</b>           | <b>2.983</b>  | <b>&lt;0.001</b> |
|            | <b>10-20</b> | <b>-51.58</b>           | <b>10.552</b> | <b>&lt;0.001</b> |
| 71-80      | <b>61-70</b> | <b>4.80</b>             | <b>1.271</b>  | <b>&lt;0.001</b> |
|            | 81-90        | 0.85                    | 0.965         | 0.378            |
|            | <b>91-00</b> | <b>-2.47</b>            | <b>1.107</b>  | <b>0.026</b>     |
|            | <b>01-10</b> | <b>-10.63</b>           | <b>2.339</b>  | <b>&lt;0.001</b> |
|            | <b>10-20</b> | <b>-46.78</b>           | <b>9.813</b>  | <b>&lt;0.001</b> |
| 81-90      | <b>61-70</b> | <b>3.95</b>             | <b>0.909</b>  | <b>&lt;0.001</b> |
|            | 71-80        | -0.85                   | 0.965         | 0.378            |
|            | <b>91-00</b> | <b>-3.32</b>            | <b>0.847</b>  | <b>&lt;0.001</b> |
|            | <b>01-10</b> | <b>-11.48</b>           | <b>2.346</b>  | <b>&lt;0.001</b> |
|            | <b>10-20</b> | <b>-47.63</b>           | <b>9.945</b>  | <b>&lt;0.001</b> |
| 91-00      | <b>61-70</b> | <b>7.28</b>             | <b>1.43</b>   | <b>&lt;0.001</b> |
|            | <b>71-80</b> | <b>2.47</b>             | <b>1.107</b>  | <b>0.026</b>     |
|            | <b>81-90</b> | <b>3.32</b>             | <b>0.847</b>  | <b>&lt;0.001</b> |
|            | <b>01-10</b> | <b>-8.16</b>            | <b>1.88</b>   | <b>&lt;0.001</b> |
|            | <b>10-20</b> | <b>-44.31</b>           | <b>9.493</b>  | <b>&lt;0.001</b> |
| 01-10      | <b>61-70</b> | <b>15.43</b>            | <b>2.983</b>  | <b>&lt;0.001</b> |
|            | <b>71-80</b> | <b>10.63</b>            | <b>2.339</b>  | <b>&lt;0.001</b> |
|            | <b>81-90</b> | <b>11.48</b>            | <b>2.346</b>  | <b>&lt;0.001</b> |
|            | <b>91-00</b> | <b>8.16</b>             | <b>1.88</b>   | <b>&lt;0.001</b> |
|            | <b>11-20</b> | <b>-36.15</b>           | <b>8.254</b>  | <b>&lt;0.001</b> |
| 11-20      | <b>61-70</b> | <b>51.58</b>            | <b>10.552</b> | <b>&lt;0.001</b> |
|            | <b>71-80</b> | <b>46.78</b>            | <b>9.813</b>  | <b>&lt;0.001</b> |
|            | <b>81-90</b> | <b>47.63</b>            | <b>9.945</b>  | <b>&lt;0.001</b> |
|            | <b>91-00</b> | <b>44.31</b>            | <b>9.493</b>  | <b>&lt;0.001</b> |
|            | <b>01-10</b> | <b>36.15</b>            | <b>8.254</b>  | <b>&lt;0.001</b> |

Table S16 Pairwise comparisons for effect of education on military background (mission-level analysis). P-values are adjusted for multiple hypothesis testing (Holm step-down procedure).

| Education (A) | Education (B) | Contrast estimate (A-B) | SE           | p-value          |
|---------------|---------------|-------------------------|--------------|------------------|
| PhD/MD        | <b>M</b>      | <b>-0.686</b>           | <b>0.086</b> | <b>&lt;0.001</b> |
|               | <b>B</b>      | <b>-0.676</b>           | <b>0.103</b> | <b>&lt;0.001</b> |
|               | No college    | -0.509                  | 0.485        | 0.295            |
| M             | <b>PhD/MD</b> | <b>0.686</b>            | <b>0.086</b> | <b>&lt;0.001</b> |
|               | B             | 0.01                    | 0.087        | 0.909            |
|               | No college    | 0.177                   | 0.476        | 0.710            |
| B             | <b>PhD/MD</b> | <b>0.676</b>            | <b>0.103</b> | <b>&lt;0.001</b> |
|               | M             | -0.01                   | 0.087        | 0.909            |
|               | No college    | 0.167                   | 0.48         | 0.728            |
| No college    | PhD/MD        | 0.509                   | 0.485        | 0.295            |
|               | M             | -0.177                  | 0.476        | 0.710            |
|               | B             | -0.167                  | 0.48         | 0.728            |

Table S17 Pairwise comparisons for effect of launch decade on military background (mission-level analysis). P-values are adjusted for multiple hypothesis testing (Holm step-down procedure).

| Decade (A) | Decade (B)   | Contrast estimate (A-B) | SE           | p-value          |
|------------|--------------|-------------------------|--------------|------------------|
| 61-70      | 71-80        | 0.109                   | 0.132        | 0.410            |
|            | <b>81-90</b> | <b>0.466</b>            | <b>0.138</b> | <b>0.001</b>     |
|            | <b>91-00</b> | <b>0.528</b>            | <b>0.125</b> | <b>&lt;0.001</b> |
|            | <b>01-10</b> | <b>0.595</b>            | <b>0.123</b> | <b>&lt;0.001</b> |
|            | <b>10-20</b> | <b>0.474</b>            | <b>0.172</b> | <b>0.006</b>     |
| 71-80      | 61-70        | -0.109                  | 0.132        | 0.410            |
|            | <b>81-90</b> | <b>0.358</b>            | <b>0.123</b> | <b>0.004</b>     |
|            | <b>91-00</b> | <b>0.419</b>            | <b>0.12</b>  | <b>0.001</b>     |
|            | <b>01-10</b> | <b>0.486</b>            | <b>0.124</b> | <b>&lt;0.001</b> |
|            | <b>10-20</b> | <b>0.366</b>            | <b>0.163</b> | <b>0.025</b>     |
| 81-90      | <b>61-70</b> | <b>-0.466</b>           | <b>0.138</b> | <b>0.001</b>     |
|            | <b>71-80</b> | <b>-0.358</b>           | <b>0.123</b> | <b>0.004</b>     |
|            | 91-00        | 0.062                   | 0.089        | 0.489            |
|            | 01-10        | 0.129                   | 0.102        | 0.206            |
|            | 10-20        | 0.008                   | 0.141        | 0.956            |
| 91-00      | <b>61-70</b> | <b>-0.528</b>           | <b>0.125</b> | <b>&lt;0.001</b> |
|            | <b>71-80</b> | <b>-0.419</b>           | <b>0.12</b>  | <b>0.001</b>     |
|            | 81-90        | -0.062                  | 0.089        | 0.489            |
|            | 01-10        | 0.067                   | 0.074        | 0.365            |
|            | 10-20        | -0.054                  | 0.128        | 0.675            |
| 01-10      | <b>61-70</b> | <b>-0.595</b>           | <b>0.123</b> | <b>&lt;0.001</b> |
|            | <b>71-80</b> | <b>-0.486</b>           | <b>0.124</b> | <b>&lt;0.001</b> |
|            | 81-90        | -0.129                  | 0.102        | 0.206            |
|            | 91-00        | -0.067                  | 0.074        | 0.365            |
|            | 11-20        | -0.121                  | 0.117        | 0.300            |
| 11-20      | <b>61-70</b> | <b>-0.474</b>           | <b>0.172</b> | <b>0.006</b>     |
|            | <b>71-80</b> | <b>-0.366</b>           | <b>0.163</b> | <b>0.025</b>     |
|            | 81-90        | -0.008                  | 0.141        | 0.956            |
|            | 91-00        | 0.054                   | 0.128        | 0.675            |
|            | 01-10        | 0.121                   | 0.117        | 0.300            |
